# Supplementary material for: Effects of environmental factors and soil properties on soil organic carbon stock in a natural dry tropical area of Cameroon
Source: Copernicus journal article supplement (doi:10.5194/soil-2021-12), 2021-05-18
Supplement: Supplementary file [file soil-2021-12-AC1-supplement.pdf]

# Reply to reviewer RC1

Dear Sir,

Thank you very much for your time which you have devoted in order to improve our manuscript. We have already take in consideration your remarks in the manuscript.

## Specific comments

Line 22: T-SOCS is introduced without defining what the T stands for. Define it here instead of later.

**Answer: T was defined**

Line 51: "Increasing the organic C or SOM, directly improves the quality of the soil, hence contributing"- Is that always true or only in soils with low SOM? This would benefit from clarification.

**Answer: That is always true since it improves for example the structural index and the CEC of the soil.**

Lines 58-59: If this is still true, a more recent reference should be included. Soil and food choices seem to be on the agenda more in recent years. Otherwise, a slight rewording would be good e.g. "has until recently been neglected".

**Answer: your suggestion was adopted**

Lines 63-64: This is very generalized. Can more figures and references be included here?

**Answer: Two new references were added**

Line 82: As opposed to what? What is wrong with being available in reports?

**Answer: Reports are unpublished. Modifications were made in the text**

Line 83: Good point which I believe is still largely true. Give more updated references. The references are too old for a key point like this as it is the basis of your paper.

**Answer: Two references of 2020 and one reference of 2021 were added**

Line 162: 7.9 is more alkaline than 6.8 is acidic - Perhaps better to omit "acidic" and say close to neutral?

**Answer: Suggestion adopted**

Line 183: I would recommend changing the heading of either section 3.3 or 4.3 slightly to make them different.

**Answer: Suggestion adopted**

Lines 190-195: There is potential for an informative figure out of this data which would be more beneficial than the figures with only 4 data points. Just a suggestion.

**Answer: A new figure 3 was added**

Lines 196-198: This sentence doesn't make sense to me. It says there is a clear link between T-SOCS and latitude but only about 70 km is covered in this study. Three of the four points are within approximately 35 km from each other. It seems very random to suggest these differences are related to latitude.

**Answer: Dear Sir, I understand you. Firstly, I delete the word "clearly". I think that it is not very random. There is a high variation of climate characteristics in our northern part of the country along the latitude. This variation has repercussions on soil forming factors and consequently on the composition and the nature of soils even in short distance. Some explanations are also given in the answer for question in lines 310-312.**

Lines 199-200: Only 4 data points are used for this when a minimum of 10 is recommended. Four data points are not reliable. I suggest omitting this or use all the replicates.

**Answer: Dear Sir, 4 data of T-SOCS correspond to 4 studied sites. To have 10 recommended data, we need then 10 studied sites. T-SOCS in a studied site is obtained through SOCS values from different soil profiles and different increments in soil profiles. This figure is important. In addition to the previous figure, we add another figure with different SOCS values (different replicates). Figure 4 is thus the plots of the soil organic carbon stock (SOCS) (a) and the total soil organic carbon stock (T-SOCS) (b) versus altitudinal gradient.**

Line 201: Again, only 4 data points.

**Answer: We also add a figure to the previous one; the new figure 5 is the plots of the soil organic carbon stock (SOCS) (a) and the total soil organic carbon stock (T-SOCS) (b) versus precipitations in the study area.**

Lines 218-220: If this is correct, a better explanation would be beneficial here. How is the acidic nature of the studied Vertisols attributed to base parent materials?

**Answer: Modifications were made in the text. It is "base-rich parent materials". They are parent materials which contain alkali and alkaline earth elements (Ca, Mg, K or Na). The presence of these elements in soils could increase the soil pH, and consequently it could be slightly acidic to neutral as observed in the studied vertisols.**

Line 304: Has anybody found similar patterns since then?

**Answer: Each author considers Jenny (1930) as a reference in his works.**

Line 309: This is not high latitude!

**Answer: Modifications were done. "high latitude" was replaced by "a higher latitude"**

Lines 310-312: I don't believe there is any evidence of this. From the location map, the southern most site is only about 70 km south of the most northern site with most sites being considerably closer to each other. I don't believe that is a reasonable distance to make judgments about latitude.

**Answer: Some modifications were made in the text. In fact, in our studied area, we are not far away from the Sahara Desert. That is why the maximum daily temperature reach for example 45°C air-shade. The variation of the climate is perceptible. Below 8°N, we have the equatorial climate (dry season=3months and rainy season=9months); from 8° to 10°N we have the Sudanian climate (dry season= 6months and rainy= 6months), from 10° to 12°30'N we have the Sudano-sahelian climate (dry season= 8 months and rainy season= 4 months) and above 12°30'N we have the Sahelian climate with minimum 9 months of dry season and maximum 3 months of rainy season. This variation of climate will have repercussions on soil forming factors and consequently on the composition and the nature of soils even in short distance. Thus variation of T-SOCS along the latitude is obvious on about 80km due to the high variations of climate**

**characteristics and the fact that we are going towards the Sahara Desert which is not far.**

Line 312: The reference is incorrect or not listed at the end. Do you mean Tan et al. (2020)? Tan's study covered 3000 km which is a lot greater than 70 km.

**Answer: Tan et al. (2020) is listed in the reference list. I think that if we take a portion in the sequence of Tan et al. (2020) in which high climate variation is observed as in our study area, a latitudinal variation of T-SOCS will also be observed.**

Lines 313-314: This sentence makes it sound like Plaza et al had an  $r^2$  value of 0.7104 but from the figures I see it was this study. You only have 4 data points when a minimum of 10 is recommended for regression analysis. I therefore suggest that you don't report this in the text as it can't be considered reliable. Alternately, why not include the replicates?

**Answer: An additional figure with replicate for SOCS was added and modifications were made in the text.**

Line 331: Yes, I thought this point would be closer to the beginning of the discussion since it is one of the first things mentioned in the abstract and there is a lot of detail about it in Table 1. You could make more of this.

**Answer: Thank you very much**

Line 343: Again, I don't believe you can conclude this from this study.

**Answer: Dear Sir, it is obvious in our study area since there is high variation in climate characteristics.**

Lines 357-358: I don't think there is a scientific basis for the statement of 71 % explanation based on the number of data points. The discussion on vegetation would benefit from being extended.

**Answer: Some modifications were made in the text.**

Line 378: Thank you.

**Answer: Thank you very much for what you have done in order to improve our manuscript.**

## **Technical comments**

Line 14: "Researches" should be "Research" and referred to as "is" rather than "are".

**Answer: Suggestions were adopted**

Line 15: Research should not be referred to as "ones". Better to say "the few existing studies are...."

**Answer: Suggestions were adopted**

Line 36: "Their organic C stocks are crucial". Soil is referred to singularly in the previous sentence so would be "Its" rather than "Their", but it would be better to say "Soil".

**Answer: Suggestions were adopted**

Line 47: The word "their" is unnecessary and incorrect.

**Answer: Suggestions were adopted**

Lines 48-50: “Thus, loss of organic C or SOM results in the loss of soil quality and impaired associated functions including soil degradation, decline in agronomic productivity, food insecurity, malnutrition and starvation” Good points but the sentence needs rewording, malnutrition and starvation are not soil functions.

**Answer: Modifications were made in the text.**

Line 72: Stock is singular so it should be “its” not “their”.

**Answer: Modifications were made in the text.**

Line 74: What is "they", soil? "Soil has the potential..." would read better.

**Answer: Suggestions were adopted**

Line 101 (and other places): sudano-sahelian – capitalise this to Sudano-Sahelian to be consistent throughout the text.

**Answer: Suggestions were adopted**

Line 159: Be consistent with capitals. Better to use BD than Bd.

**Answer: Suggestions were adopted**

Lines 212-213: Should be especially, not specially and no need for the word "and".

**Answer: Suggestions were adopted**

Line 305: Better to say “only a small fraction....”

**Answer: Suggestions were adopted**

Line 307: Delete the word “part”.

**Answer: Suggestions were adopted**
